# Supplementary material
Source: Springer Nature journal article supplement (https://www.springermedizin.de/resource/supplementary/12931_2013_1432_MOESM3_ESM.pdf/9425990)

## Variables entered

**Step 5:** CRP

**Step 4:** FFMI

**Step 3:** Quadriceps strength

**Step 2:** Walking speed

**Step 1:** FEV<sub>1</sub>

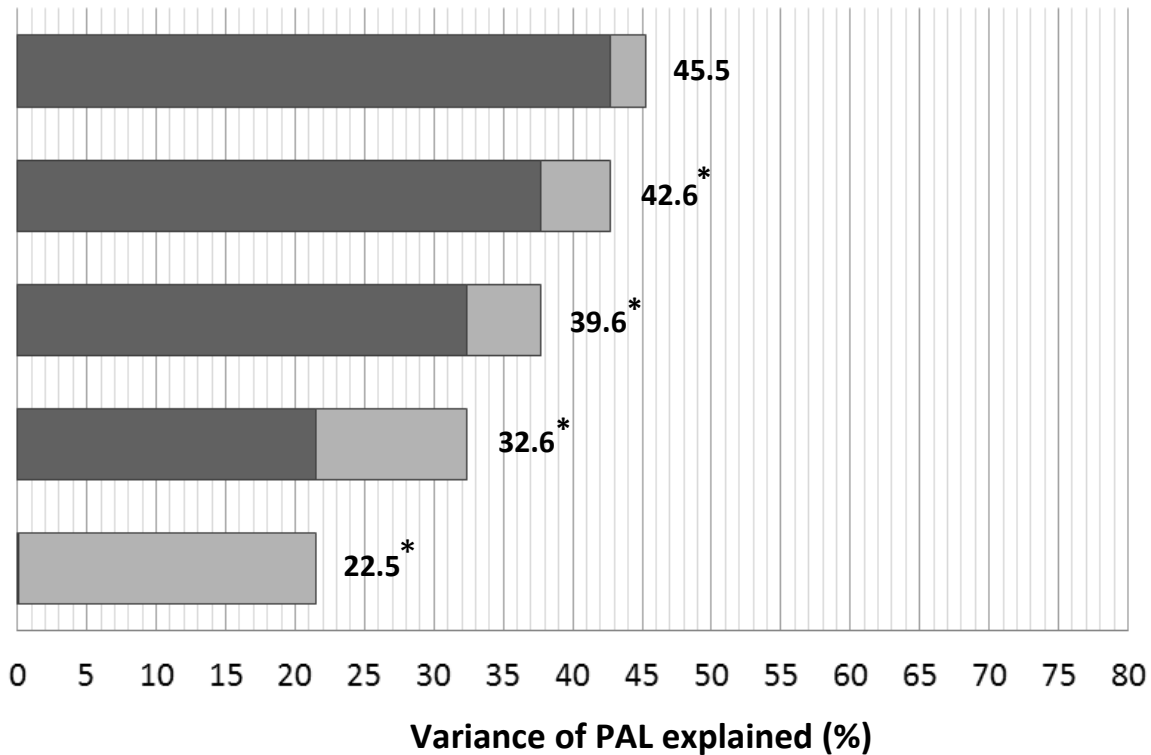

Supplement: MOESM3 [file 9425990]
